# Supplementary material for: Keratinophilic and Keratinolytic Fungi in Cave Ecosystems: A Culture-Based Study of Brestovská Cave and Demänovská Ľadová and Slobody Caves (Slovakia)
Source: MDPI journal article supplement (doi:10.3390/app12031455), 2022-01-29
Supplement: s1 [file s1]

## Supplementary Materials

**Table S1.** BLAST analysis of rDNA ITS of keratinophilic and keratinolytic fungi occurring in selected caves in Slovakia. All E values were zero).

| No. | Fungal species                    | Isolate | GenBank<br>Accession<br>No. | Product<br>size<br>(bp) | Identity with Sequence from GenBank |             |             |
|-----|-----------------------------------|---------|-----------------------------|-------------------------|-------------------------------------|-------------|-------------|
|     |                                   |         |                             |                         | Query<br>Cover, %                   | Identity, % | Accession   |
| 1.  | <i>Pseudogymnoascus pannorum</i>  | UWR_265 | OL362050                    | 470                     | 100.00                              | 99.79       | MK421366.1  |
| 2.  | <i>Keratinophyton wagneri</i>     | UWR_266 | OL362051                    | 508                     | 100.00                              | 100.00      | NR_173387.1 |
| 3.  | <i>Pseudogymnoascus pannorum</i>  | UWR_267 | OL362052                    | 411                     | 100.00                              | 100.00      | MH469520.1  |
| 4.  | <i>Arthroderma quadrifidum</i>    | UWR_268 | OL362053                    | 411                     | 100.00                              | 99.76       | MG561441.1  |
| 5.  | <i>Pseudogymnoascus pannorum</i>  | UWR_269 | OL362054                    | 497                     | 100.00                              | 99.80       | MH865434.1  |
| 6.  | <i>Penicillium griseofulvum</i>   | UWR_270 | OL362055                    | 496                     | 100.00                              | 100.00      | MN545450.1  |
| 7.  | <i>Penicillium brevicompactum</i> | UWR_271 | OL362056                    | 495                     | 100.00                              | 100.00      | KY401133.1  |
| 8.  | <i>Metapochonia suchlasporia</i>  | UWR_272 | OL362057                    | 498                     | 100.00                              | 100.00      | MT079164.1  |
| 9.  | <i>Arthroderma quadrifidum</i>    | UWR_273 | OL362058                    | 521                     | 100.00                              | 99.42       | MG561441.1  |
| 10. | <i>Penicillium chrysogenum</i>    | UWR_274 | OL362059                    | 490                     | 100.00                              | 100.00      | MT594471.1  |
| 11. | <i>Aphanoascus keratinophilus</i> | UWR_275 | OL362060                    | 510                     | 100.00                              | 100.00      | MW616942.1  |
| 12. | <i>Pseudogymnoascus pannorum</i>  | UWR_276 | OL362061                    | 497                     | 100.00                              | 100.00      | MH865434.1  |
| 13. | <i>Chrysosporium siglerae</i>     | UWR_277 | OL362062                    | 446                     | 100.00                              | 99.78       | KT155909.1  |
| 14. | <i>Penicillium charlesii</i>      | UWR_278 | OL362063                    | 483                     | 100.00                              | 100.00      | MT309660.1  |
| 15. | <i>Arthroderma multifidum</i>     | UWR_279 | OL362064                    | 502                     | 100.00                              | 100.00      | MH860194.1  |
| 16. | <i>Cosmospora viridescens</i>     | UWR_280 | OL362065                    | 415                     | 100.00                              | 99.28       | MK911617.1  |
| 17. | <i>Chrysosporium europae</i>      | UWR_281 | OL362066                    | 533                     | 100.00                              | 100.00      | NR_077134.1 |
| 18. | <i>Pseudogymnoascus pannorum</i>  | UWR_282 | OL362067                    | 388                     | 100.00                              | 99.23       | KY432734.1  |
| 19. | <i>Arthroderma multifidum</i>     | UWR_283 | OL362068                    | 536                     | 100.00                              | 100.00      | MH860194.1  |
| 20. | <i>Arthroderma quadrifidum</i>    | UWR_284 | OL362069                    | 527                     | 100.00                              | 99.24       | MG561441.1  |
| 21. | <i>Pseudogymnoascus pannorum</i>  | UWR_285 | OL362070                    | 505                     | 100.00                              | 100.00      | MT573491.1  |
| 22. | <i>Arthroderma insingulare</i>    | UWR_286 | OL362071                    | 482                     | 100.00                              | 99.79       | MW084975.1  |
| 23. | <i>Cordyceps fumosorosea</i>      | UWR_287 | OL362072                    | 527                     | 100.00                              | 100.00      | MT079165.1  |
| 24. | <i>Arthroderma quadrifidum</i>    | UWR_288 | OL362073                    | 362                     | 100.00                              | 99.72       | MK298678.1  |
| 25. | <i>Arthroderma quadrifidum</i>    | UWR_289 | OL362074                    | 533                     | 100.00                              | 99.44       | MG561441.1  |
| 26. | <i>Pseudogymnoascus pannorum</i>  | UWR_290 | OL362075                    | 365                     | 100.00                              | 100.00      | MT003118.1  |
| 27. | <i>Chrysosporium merdarium</i>    | UWR_291 | OL362076                    | 448                     | 100.00                              | 100.00      | MW710148.1  |
| 28. | <i>Arthroderma quadrifidum</i>    | UWR_292 | OL362077                    | 498                     | 100.00                              | 99.40       | MG561441.1  |
| 29. | <i>Pseudogymnoascus pannorum</i>  | UWR_293 | OL362078                    | 429                     | 100.00                              | 99.77       | MT573491.1  |
| 30. | <i>Aspergillus fumigatus</i>      | UWR_294 | OL362079                    | 456                     | 100.00                              | 99.78       | MH864580.1  |
| 31. | <i>Arthroderma eboreum</i>        | UWR_295 | OL362080                    | 489                     | 100.00                              | 99.80       | KC008579.1  |
| 32. | <i>Arthroderma quadrifidum</i>    | UWR_296 | OL362081                    | 474                     | 100.00                              | 99.79       | MK298678.1  |

**Table S2.** Number of keratinophilic and keratinolytic fungal species isolated from the studied locations of Slovakia caves and the Shannon diversity index for the interior study sites. <sup>1</sup>See Figure 1 for locations (I – outside underground facilities, II-VIII – inside underground facilities).

| Study sites <sup>1</sup> | Number of keratinophilic and keratinolytic fungal species |                        |                         |
|--------------------------|-----------------------------------------------------------|------------------------|-------------------------|
|                          | Brestovská Cave                                           | Demänovská Ľadová Cave | Demänovská Slobody Cave |
| I                        | 1                                                         | 2                      | 1                       |
| II                       | 1                                                         | 2                      | 2                       |
| III                      | 3                                                         | 3                      | 3                       |
| IV                       | 1                                                         | 4                      | 1                       |
| V                        | 3                                                         | 2                      | 3                       |
| VI                       | 1                                                         | 1                      | 3                       |
| VII                      | 3                                                         | 3                      | 4                       |
| VIII                     | 1                                                         | 2                      | 2                       |
| Shannon index            | 0.784                                                     | 0.814                  | 0.816                   |
